tion of their patients. If esmolol does not effect its anesthetic action *via* nitrous oxide, did the authors notice a difference in the time to loss of consciousness between the propofol only, and the propofol plus esmolol groups, in the absence of nitrous oxide?

**Dmitry Baranov, M.D.**

Instructor of Anesthesiology

**Roger J. Bagshaw, M.D.**

Associate Professor of Anesthesiology

Department of Anesthesia

Hospital of the University of Pennsylvania

3400 Spruce Street

Philadelphia, Pennsylvania 19104-4283

## References

1. Johansen JW, Flaishon R, Sebel PS: Esmolol reduces anesthetic requirement for skin incision during propofol/nitrous oxide/morphine anesthesia. *ANESTHESIOLOGY* 1997; 86:364-71

Anesthesiology

1997; 87:462

© 1997 American Society of Anesthesiologists, Inc.

Lippincott-Raven Publishers

*In Reply:*— We appreciate Dr. Baranov and Dr. Bagshaw's constructive comments. The mechanism by which esmolol decreases anesthetic requirements cannot be deduced from our paper. Our goal was to document the existence of this interaction. The balanced-anesthetic technique used in the paper was complex, involving propofol, nitrous oxide, and morphine premedication. At the time, this technique represented the best clinical conditions for demonstrating the effect of esmolol. An interaction between any of the anesthetic components could be hypothesized. The experiment was specifically designed to examine the interaction under conditions approaching steady state. No attempt was made to evaluate differences in anesthetic induction between groups.

Currently, available clinical evidence suggests that esmolol potentiates opioid action. We have found that esmolol has no effect on isoflurane MAC alone but can potentiate MAC reduction by alfentanil.<sup>1</sup> This supports an earlier observation by Stanley *et al.*<sup>2</sup> that patients receiving long-term, propranolol treatment required 25% less fentanyl to produce loss of consciousness.

2. Smith C, McEwan AI, Jhaveri R, Wilkinson M, Goodman D, Smith LR, Canada AT, Glass PSA: The interaction of fentanyl on the Cp50 of propofol for loss of consciousness and skin incision. *ANESTHESIOLOGY* 1994; 81:820-8

3. Yli-Hankala A, Lindgren L, Porkkala T, Jantti V: Nitrous oxide-mediated activation of the EEG during isoflurane anaesthesia in patients. *Br J Anesth* 1993; 70:54-7

4. Chortkoff BS, Bennett HL, Eger EI: Does nitrous oxide antagonize isoflurane-induced suppression of learning. *ANESTHESIOLOGY* 1993; 79:724-32

5. Perel A, Schneider A: Esmolol reduces MAC of halothane in the presence of nitrous oxide in rats (abstr). *ANESTHESIOLOGY* 1993; 79:A4

6. Smith I, Hemrijck JV, White PF: Efficacy of esmolol versus alfentanil as a supplement to propofol-nitrous oxide anesthesia. *Anesth Analg* 1991; 73:540-6

7. Bagshaw RJ, Conahan TJ, Delling C, Geer RT, Levy WJ, Young ML: Esmolol as an anesthetic adjunct in ambulatory surgery. *Ambulatory Surg* 1995; 3:13-7

(Accepted for publication April 26, 1997.)

**Jay W. Johansen, M.D., Ph.D.**

Assistant Professor of Anesthesiology

**Peter S. Sebel, M.B., B.S., Ph.D., F.F.A.R.C.S.I.**

Professor of Anesthesiology

Emory University School of Medicine

Atlanta, Georgia 30322

## References

1. Johansen JW, Windsor A, Sebel P: Esmolol potentiates isoflurane MAC reduction by alfentanil. *ANESTHESIOLOGY* 1996; 85:A392

2. Stanley TH, deLange S, Boscoe MJ, deBruijn N: The influence of chronic preoperative propranolol therapy on cardiovascular dynamics and narcotic requirements during operation in patients with coronary artery disease. *Can Anaesth Soc J* 1982; 29:319-24

(Accepted for publication April 26, 1997.)
